# Supplementary material for: An optimal molecule-matching co-sensitization system for the improvement of photovoltaic performances of DSSCs
Source: Royal Society of Chemistry journal article supplement (doi:10.1039/d2cp02796h), 2022-01-01
Supplement: d2cp02796h1.pdf [file d2cp02796h1.pdf]

*Electronic Supplementary Information*

**Optimal molecule-matching co-sensitization system for the  
improvement of photovoltaic performances of DSSCs**

Yongliang Liu <sup>a</sup>, Shengbo Zhu <sup>a, \*</sup>, Wei Li <sup>a</sup>, Yilin Su <sup>a</sup>, Hongwei Zhou <sup>a</sup>, Ran Chen <sup>b</sup>,  
Weixing Chen <sup>a</sup>, Wenzhi Zhang <sup>a</sup>, Xiaoling Niu <sup>a</sup>, Xinbing Chen <sup>b</sup>, Zhongwei An <sup>b</sup>

<sup>a</sup> Shaanxi Key Laboratory of Photoelectric Functional Materials and Devices;  
Engineering Research Center of Light Stabilizers for Polymer Materials, Universities  
of Shaanxi Province; School of Materials and Chemical Engineering, Xi'an  
Technological University, Xi'an 710021, China

<sup>b</sup> Key Laboratory of Applied Surface and Colloid Chemistry (MOE); International  
Joint Research Center of Shaanxi Province for Photoelectric Materials Science,  
Shaanxi Key Laboratory for Advanced Energy Devices; Shaanxi Engineering  
Laboratory for Advanced Energy Technology, School of Materials Science and  
Engineering, Shaanxi Normal University, Xi'an 710119, PR China.

**Corresponding Authors**

Shengbo Zhu

E-mail: zhushengbo@xatu.edu.cn

## 1. Molecular structure confirmation

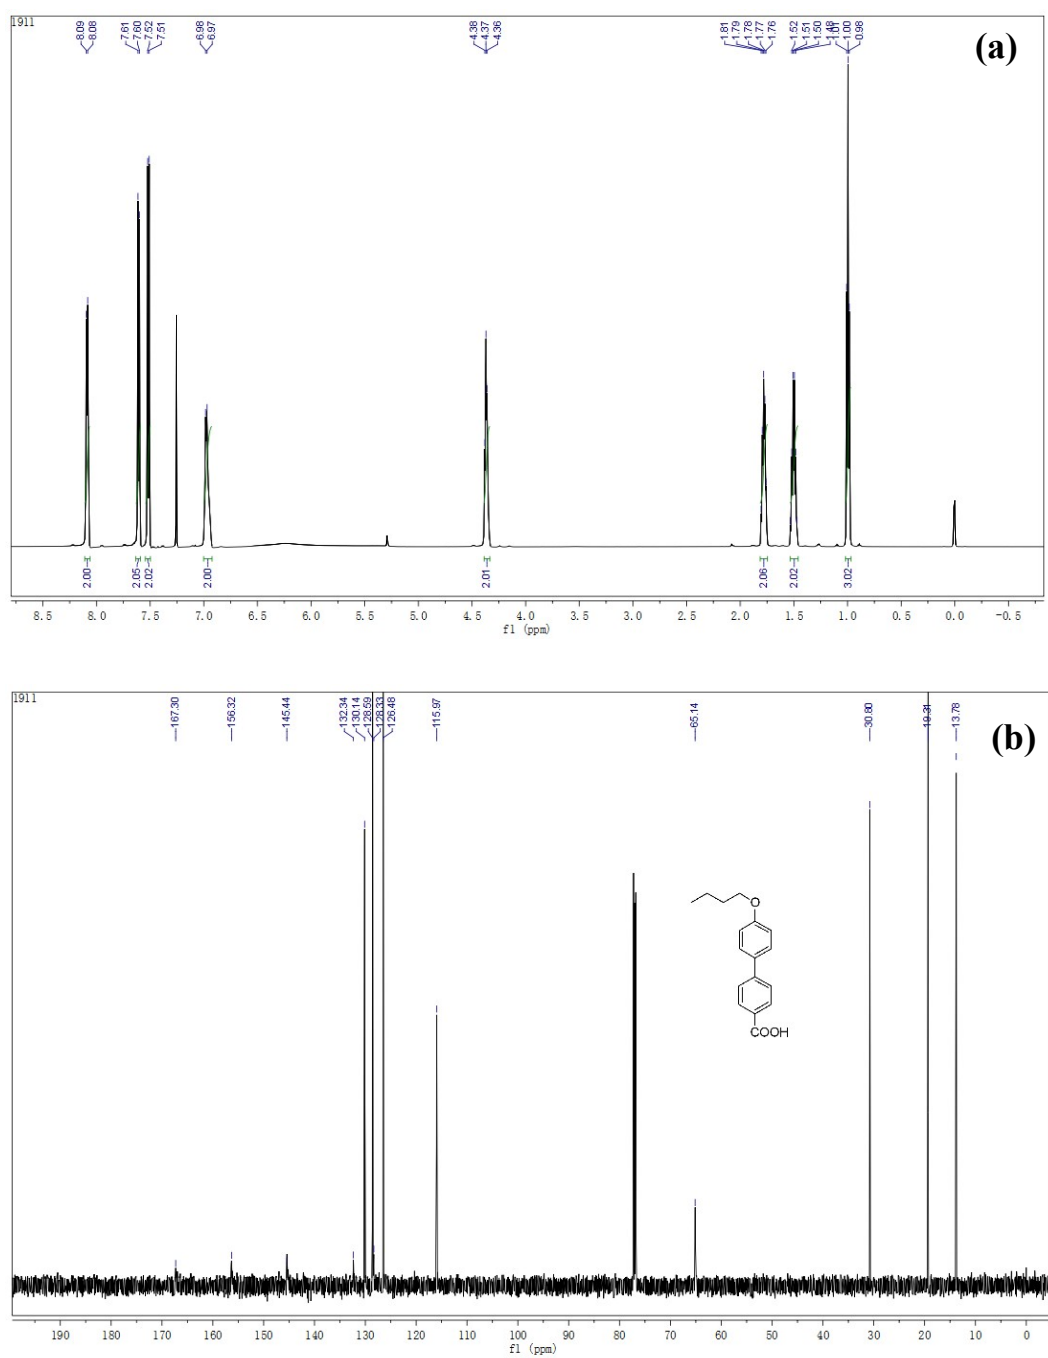

**Fig. S1.** (a)  $^1\text{H}$  NMR and (b)  $^{13}\text{C}$  NMR of compound 4OBA.

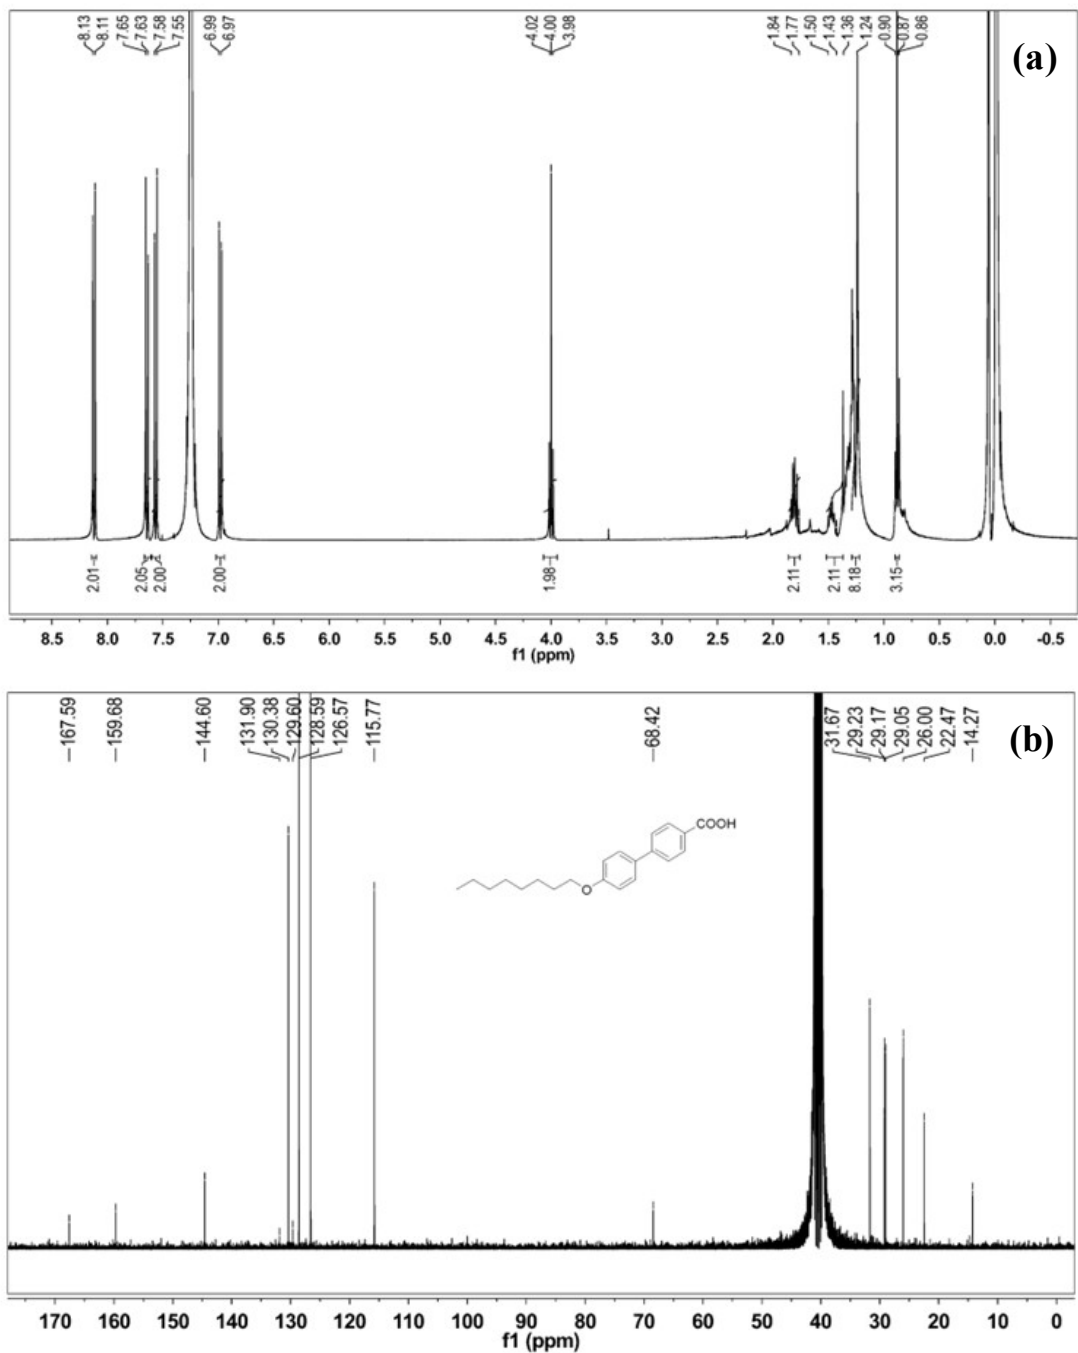

Fig. S2. (a)  $^1\text{H}$  NMR and (b)  $^{13}\text{C}$  NMR of compound 8OBA.

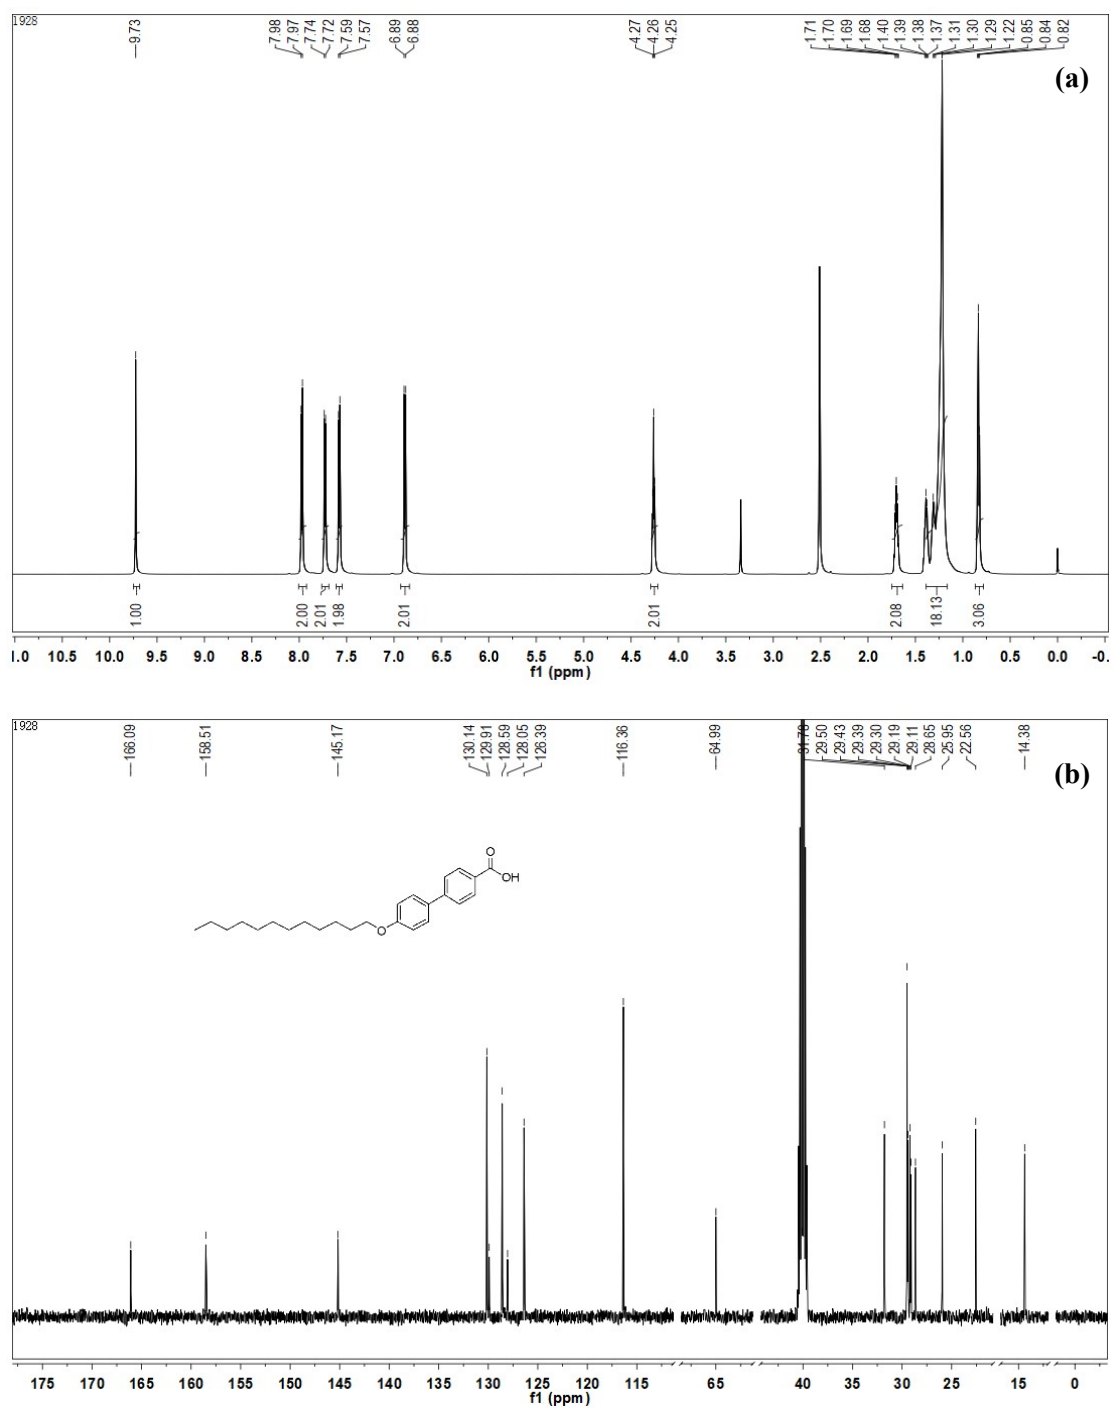

**Fig. S3.** (a)  $^1\text{H}$  NMR and (b)  $^{13}\text{C}$  NMR of compound 12OBA.

## Display Report

### Analysis Info

Analysis Name D:\Data\2022\0714\2229-1.d  
Method neg\_low-2.m  
Sample Name zhushengbo  
Comment

Acquisition Date 2022-07-14 11:31:15

Operator Fan  
Instrument maXis 10103

### Acquisition Parameter

|             |            |                       |           |                  |           |
|-------------|------------|-----------------------|-----------|------------------|-----------|
| Source Type | ESI        | Ion Polarity          | Negative  | Set Nebulizer    | 0.4 Bar   |
| Focus       | Not active | Set Capillary         | 4000 V    | Set Dry Heater   | 180 °C    |
| Scan Begin  | 50 m/z     | Set End Plate Offset  | -500 V    | Set Dry Gas      | 4.0 l/min |
| Scan End    | 850 m/z    | Set Collision Cell RF | 300.0 Vpp | Set Divert Valve | Waste     |

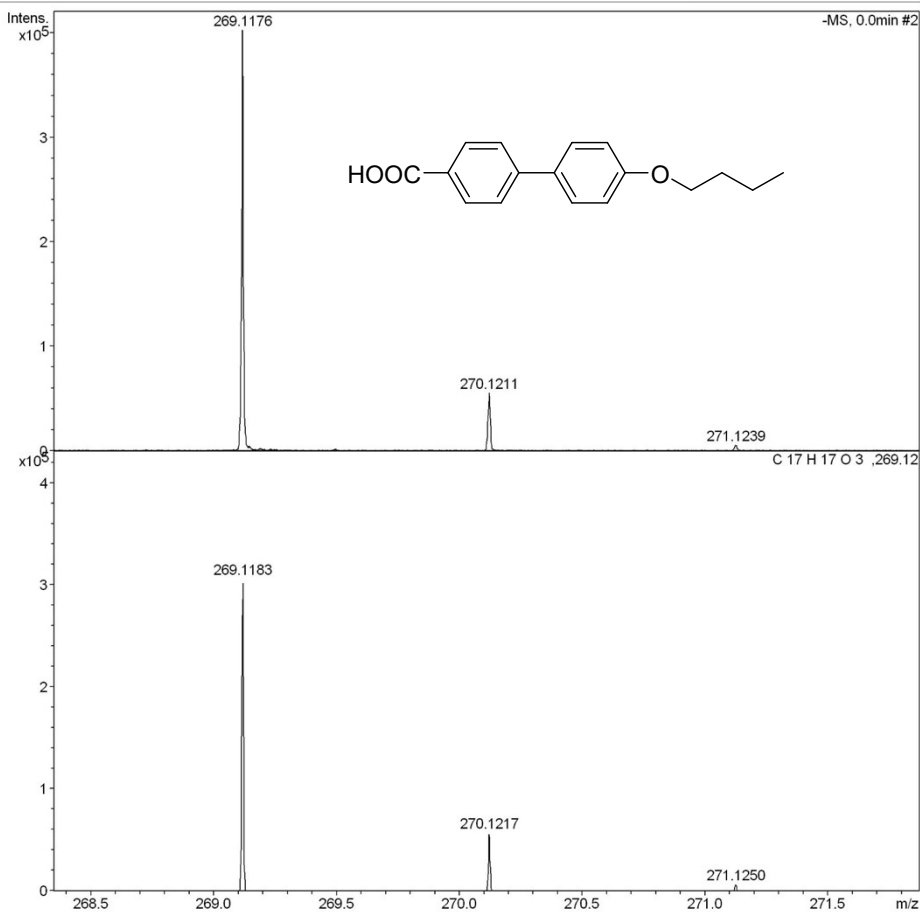

**Fig. S4. HRMS of 4OBA.**

## Display Report

### Analysis Info

Analysis Name D:\Data\2022\0714\2230-1.d  
Method neg\_low-2.m  
Sample Name zhushengbo  
Comment

Acquisition Date 2022-07-14 11:32:34

Operator Fan  
Instrument maXis 10103

### Acquisition Parameter

|             |            |                       |           |                  |           |
|-------------|------------|-----------------------|-----------|------------------|-----------|
| Source Type | ESI        | Ion Polarity          | Negative  | Set Nebulizer    | 0.4 Bar   |
| Focus       | Not active | Set Capillary         | 4000 V    | Set Dry Heater   | 180 °C    |
| Scan Begin  | 50 m/z     | Set End Plate Offset  | -500 V    | Set Dry Gas      | 4.0 l/min |
| Scan End    | 850 m/z    | Set Collision Cell RF | 300.0 Vpp | Set Divert Valve | Waste     |

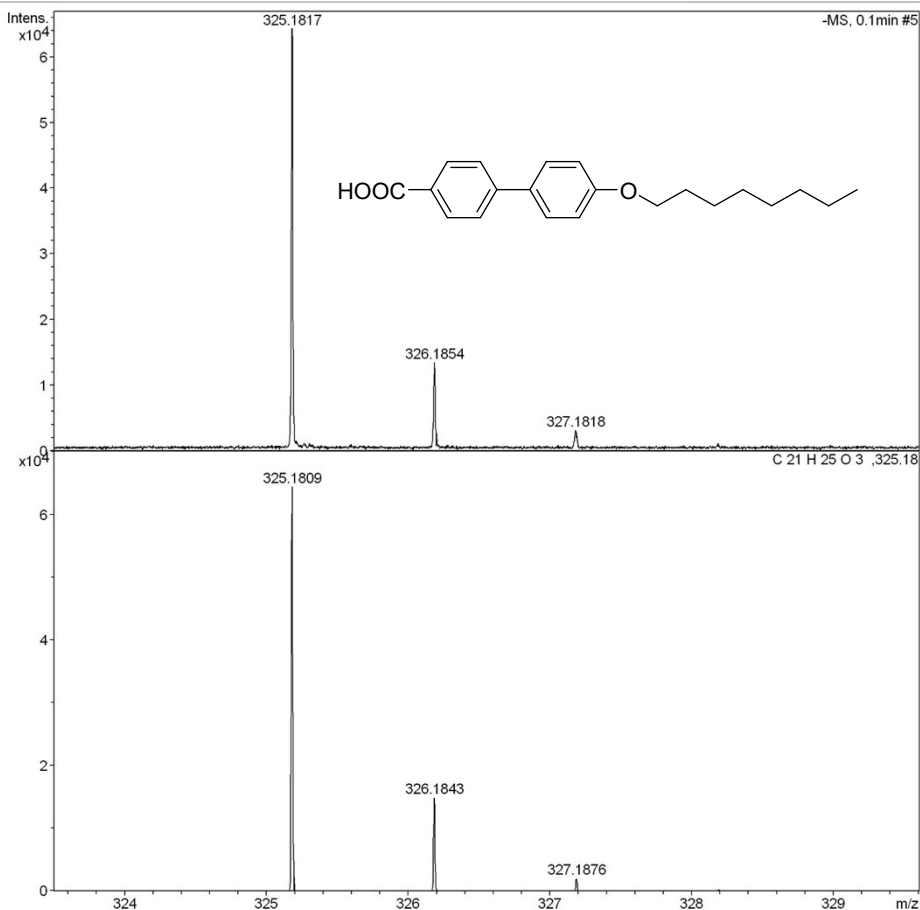

**Fig. S5. HRMS of 8OBA.**

## Display Report

### Analysis Info

Analysis Name D:\Data\2022\0714\2231-1.d  
Method neg\_low-2.m  
Sample Name zhushengbo  
Comment

Acquisition Date 2022-07-14 11:33:41

Operator Fan  
Instrument maXis 10103

### Acquisition Parameter

|             |            |                       |           |                  |           |
|-------------|------------|-----------------------|-----------|------------------|-----------|
| Source Type | ESI        | Ion Polarity          | Negative  | Set Nebulizer    | 0.4 Bar   |
| Focus       | Not active | Set Capillary         | 4000 V    | Set Dry Heater   | 180 °C    |
| Scan Begin  | 50 m/z     | Set End Plate Offset  | -500 V    | Set Dry Gas      | 4.0 l/min |
| Scan End    | 850 m/z    | Set Collision Cell RF | 300.0 Vpp | Set Divert Valve | Waste     |

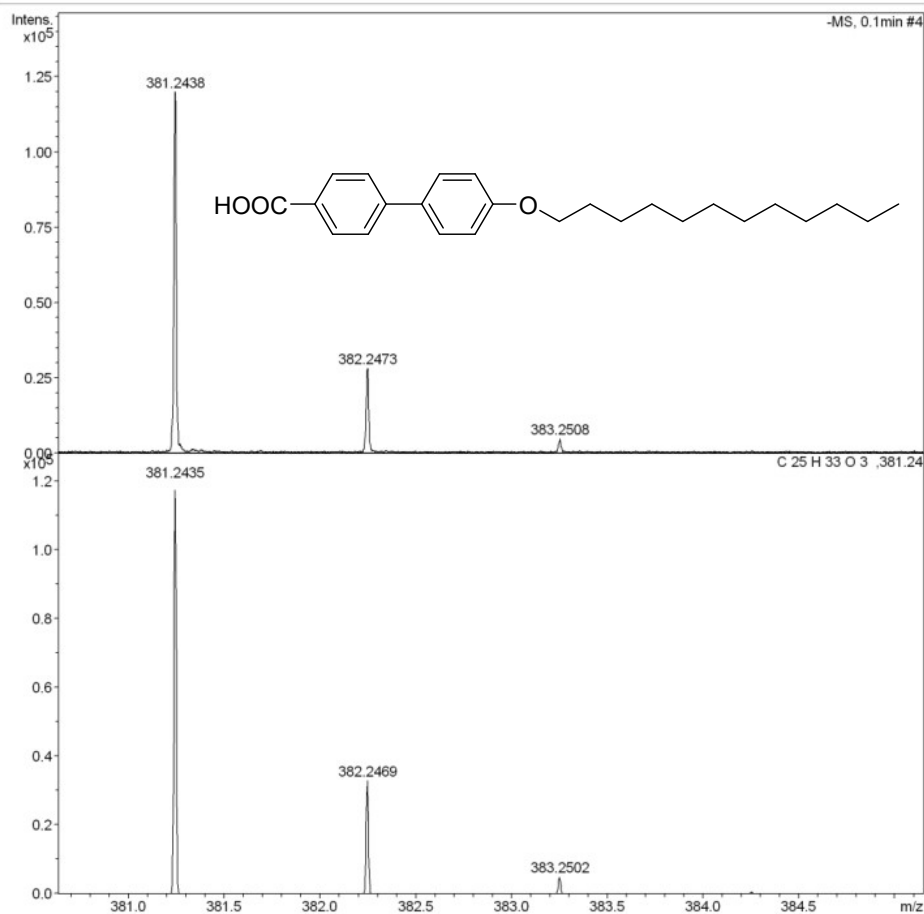

**Fig. S6. HRMS of 12OBA.**

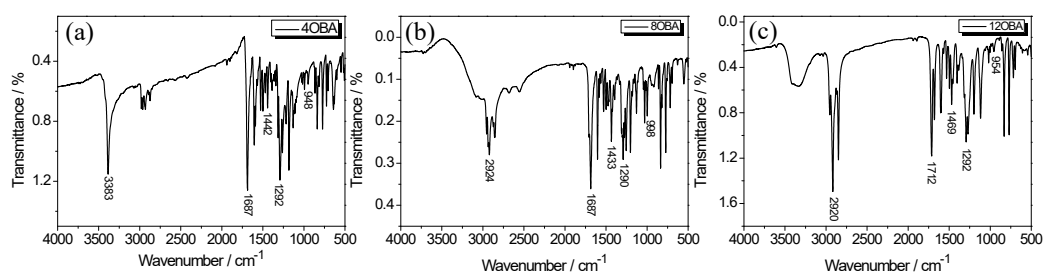

**Fig. S7.** FT-IR spectra of (a) 4OBA, (b) 8OBA and (c) 12OBA.



## 2. Thermal stability

It is crucial to study the thermal behavior of sensitizers, and good thermal behavior is a prerequisite for organic materials used in photovoltaic applications. The thermal properties of the co-sensitizers **nOBA** ( $n=4, 8$  and  $12$ ) are studied by differential scanning calorimetry (DSC) and thermogravimetric analyses (TGA) at the heating rate of  $10\text{ }^{\circ}\text{C min}^{-1}$  under an argon atmosphere. The DSC and TGA curves of **nOBA** ( $n=4, 8$  and  $12$ ) are shown in Fig. S8 and S9, respectively. All the co-sensitizers **nOBA** ( $n=4, 8$  and  $12$ ) exhibit satisfactory thermal stability with high thermal decomposition ( $T_d$ ) temperatures at  $255\text{ }^{\circ}\text{C}$  (**4OBA**),  $280\text{ }^{\circ}\text{C}$  (**8OBA**) and  $310\text{ }^{\circ}\text{C}$  (**12OBA**) (*Mater. Chem. Front.*, 2022, **6**, 580-592; *Phys. Chem. Chem. Phys.*, 2020, **22**, 23169-23184; *Thermochim. Acta*, 2006, **440**, 181-187). The test results are as follows:

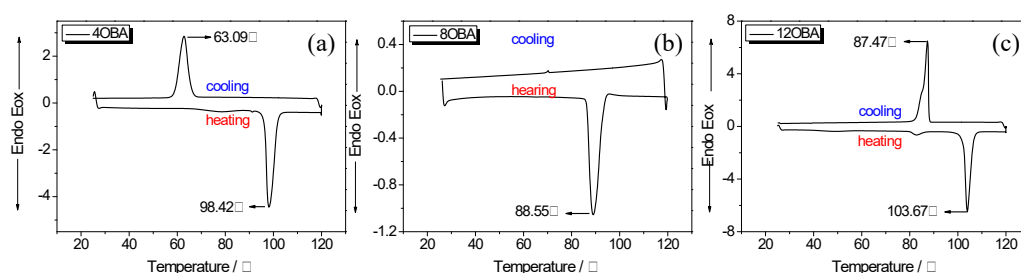

**Fig. S8.** DSC curves of (a) **4OBA**, (b) **8OBA** and (c) **12OBA**.

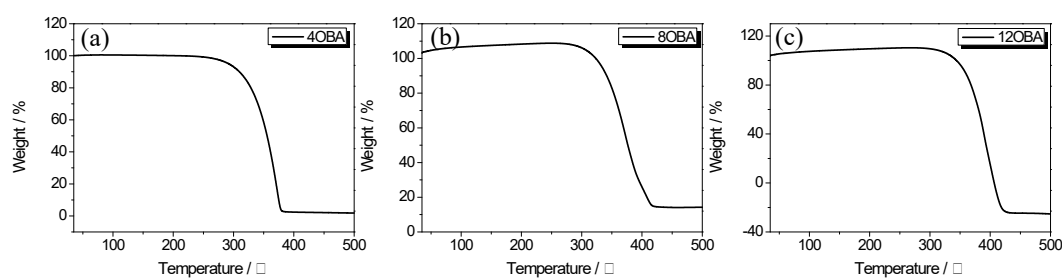

**Fig. S9.** TGA curves of (a) **4OBA**, (b) **8OBA** and (c) **12OBA**.

### 3. Application evaluation

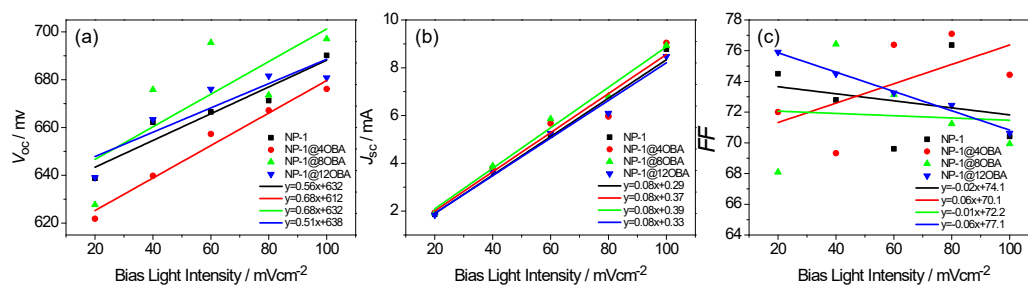

**Fig. S10.** (a)  $V_{oc}$ , (b)  $J_{sc}$  and (c)  $FF$  of DSSCs under different irradiations.

In addition to testing the photovoltaic parameters under different irradiation conditions, their durability was also tested. The following figure shows the 1000 h durability of the DSSC devices. The results are shown in Fig. S11 and Table S3.

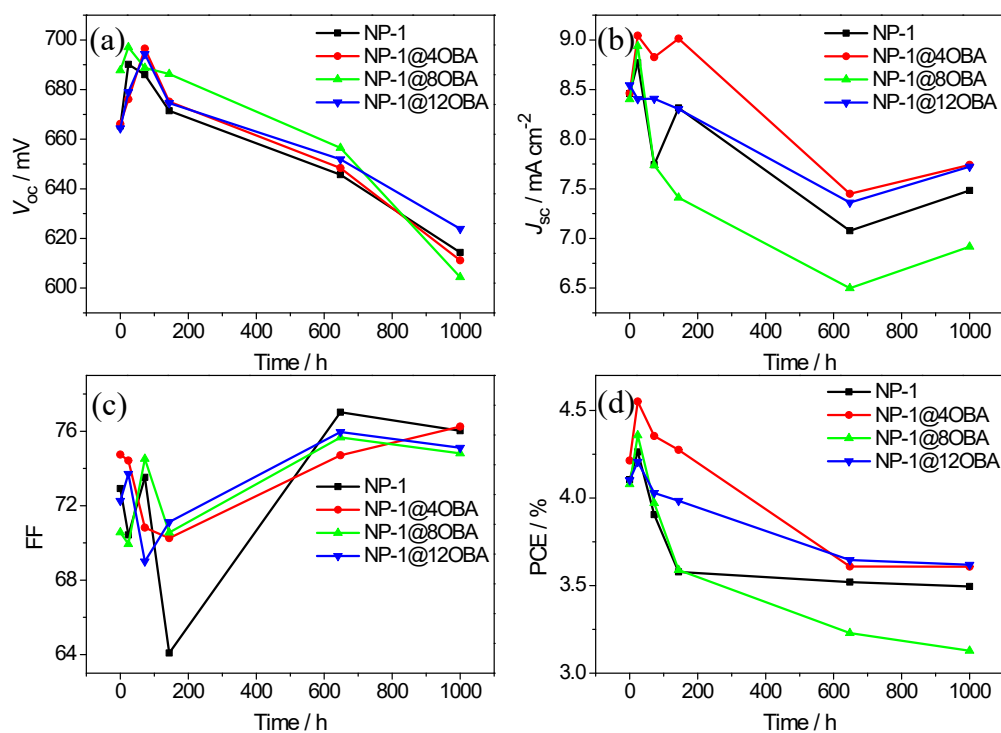

**Fig. S11.** Durability of (a)  $V_{oc}$ , (b)  $J_{sc}$ , (c)  $FF$  and (d) PCE of DSSCs based on NP-1, NP-1@4OBA, NP-1@8OBA, NP-1@12OBA for 1000 h.

**Table S1** The length ( $L$ ), height ( $H$ ) and width ( $W$ ) of the three-dimensional structures, and the ratio of  $H$  and  $W$ .

| Dye          | $L(\text{\AA})$ | $H(\text{\AA})$ | $W(\text{\AA})$ | $H/W$ |
|--------------|-----------------|-----------------|-----------------|-------|
| <b>NP-1</b>  | 21.67           | 10.07           | 4.64            | 2.17  |
| <b>4OBA</b>  | 17.91           | 5.61            | 3.38            | 1.66  |
| <b>8OBA</b>  | 22.93           | 6.05            | 3.42            | 1.77  |
| <b>12OBA</b> | 28.33           | 6.31            | 3.31            | 1.91  |

**Table S2** Photovoltaic performances of DSSCs under different irradiation.

| Devices           | Bias Light Intensity / $\text{mW cm}^{-2}$ | $V_{oc}$ / mV | $J_{sc}$ / $\text{mA cm}^{-2}$ | $FF$ / % | PCE / % |
|-------------------|--------------------------------------------|---------------|--------------------------------|----------|---------|
| <b>NP-1</b>       | 20                                         | 638.72        | 1.87                           | 74.50    | 0.89    |
|                   | 40                                         | 662.19        | 3.74                           | 72.80    | 1.80    |
|                   | 60                                         | 666.49        | 5.18                           | 69.61    | 2.40    |
|                   | 80                                         | 671.23        | 6.03                           | 76.36    | 3.09    |
|                   | 100                                        | 690.18        | 8.77                           | 70.42    | 4.26    |
| <b>NP-1@4OBA</b>  | 20                                         | 621.80        | 1.93                           | 72.00    | 0.86    |
|                   | 40                                         | 639.81        | 3.82                           | 69.33    | 1.69    |
|                   | 60                                         | 657.26        | 5.67                           | 76.38    | 2.84    |
|                   | 80                                         | 667.19        | 5.96                           | 77.10    | 3.06    |
|                   | 100                                        | 676.13        | 9.04                           | 74.43    | 4.55    |
| <b>NP-1@8OBA</b>  | 20                                         | 627.67        | 1.92                           | 68.09    | 0.82    |
|                   | 40                                         | 675.87        | 3.89                           | 76.43    | 2.01    |
|                   | 60                                         | 695.48        | 5.86                           | 73.14    | 2.98    |
|                   | 80                                         | 673.55        | 6.81                           | 71.24    | 3.27    |
|                   | 100                                        | 697.11        | 8.94                           | 69.94    | 4.36    |
| <b>NP-1@12OBA</b> | 20                                         | 639.06        | 1.83                           | 75.91    | 0.89    |
|                   | 40                                         | 663.37        | 3.62                           | 74.49    | 1.79    |
|                   | 60                                         | 676.09        | 5.26                           | 73.25    | 2.60    |
|                   | 80                                         | 681.62        | 6.10                           | 72.45    | 3.01    |
|                   | 100                                        | 680.84        | 8.47                           | 70.64    | 4.07    |

**Table S3** The length (L), Durability data of  $V_{oc}$ ,  $J_{sc}$ ,  $FF$ , PCE for DSSCs based on NP-1, NP-1@4OBA, NP-1@8OBA, NP-1@12OBA for 1000 h.

| Devices    | Time / h | $V_{oc}$ / mV | $J_{sc}$ / mA cm <sup>-2</sup> | $FF$ / % | PCE / % |
|------------|----------|---------------|--------------------------------|----------|---------|
| NP-1       | 0        | 665.35        | 8.46                           | 72.92    | 4.10    |
|            | 24       | 690.18        | 8.77                           | 70.42    | 4.26    |
|            | 72       | 685.97        | 7.74                           | 73.53    | 3.91    |
|            | 144      | 671.44        | 8.31                           | 64.09    | 3.58    |
|            | 648      | 645.70        | 7.08                           | 77.02    | 3.52    |
|            | 1000     | 614.35        | 7.48                           | 76.02    | 3.50    |
| NP-1@4OBA  | 0        | 666.20        | 8.46                           | 74.75    | 4.21    |
|            | 24       | 676.13        | 9.04                           | 74.43    | 4.55    |
|            | 72       | 696.49        | 8.83                           | 70.82    | 4.35    |
|            | 144      | 675.16        | 9.01                           | 70.25    | 4.28    |
|            | 648      | 648.37        | 7.45                           | 74.71    | 3.61    |
|            | 1000     | 611.19        | 7.74                           | 76.25    | 3.61    |
| NP-1@8OBA  | 0        | 687.78        | 8.40                           | 70.57    | 4.08    |
|            | 24       | 697.11        | 8.94                           | 69.94    | 4.36    |
|            | 72       | 688.77        | 7.74                           | 74.52    | 3.97    |
|            | 144      | 686.27        | 7.41                           | 70.56    | 3.59    |
|            | 648      | 656.49        | 6.50                           | 75.67    | 3.23    |
|            | 1000     | 604.41        | 6.92                           | 74.81    | 3.13    |
| NP-1@12OBA | 0        | 664.40        | 8.54                           | 72.26    | 4.10    |
|            | 24       | 679.01        | 8.41                           | 73.71    | 4.21    |
|            | 72       | 694.32        | 8.41                           | 69.01    | 4.03    |
|            | 144      | 674.58        | 8.30                           | 71.12    | 3.98    |
|            | 648      | 651.94        | 7.36                           | 75.96    | 3.65    |
|            | 1000     | 623.89        | 7.72                           | 75.11    | 3.62    |
